# Supplementary material for: The effect of transcutaneous electrical nerve stimulation on fatigue recovery in recreational rowers
Source: PeerJ. 2025 Apr 29;13:e19388. doi: 10.7717/peerj.19388 (PMC12047223; doi:10.7717/peerj.19388)
Supplement: Supplemental Information 1 [file peerj-13-19388-s001.xlsx]

## Sheet: results
		Test records of rowers
subject	group	serial number	gender	age	Training years (months)	Height (m)	Weight (kg)	BMI	Best result of 2000m dynamometer	Right leg length (cm)	Right calf length (cm)	Left leg length (cm)	Left calf (cm)	2000 m test results	Paddle frequency (times/min)	RPE Grade (Grade)			Immediate heart rate (times/min)			Blood lactic acid (mol/L)				Quadriceps muscle strength (kg)	TENS Intervention value
																T1	T2	T3	T1	T2	T3	T1	T2（1min）	T2（3min）	T3	T1（R）
1	TENS group	1	female	19	2	1.75	64.7	21.1265		91	43	91.5	43.5	8′49	24	11	19	10	95	177	79	2.32	14.84	14.43	7.31	33.8	52
2		2	male	20	18	1.73	67.5	22.5534	7′15	93	46	92.5	45.5	7′14	28	7	18	7	98	178	111	2.85	20.63	18.58	11.56	54.3	44
3		3	male	20	4	1.89	76.8	21.5	7′16	97	47	98.5	47	7′03	29	11	19	9	108	171	102	2.92	23.62	22.39	13.23	38.7	45
4		4	male	20	12	1.78	65.7	20.736	7′32	92	43	92	42.5	7′25	29	12	17	9	107	192	108	2.93	18.56	20.85	7.3	35.5	34
5		5	male	20	3	1.85	72.6	21.2126	7′28	97	47	97.5	47	7′28	27	7	18	12	88	197	111	3.17	20.94	18.28	10.44	50.3	52
6		6	male	20	12	1.73	67.6	22.5868	7′40	92	43	92	43	7′32	27	7	17	7	85	198	80	2.3	19.67	16.21	6.43	57.3	58
7		7	male	20	18	1.81	73.7	22.4963	7′15	98	45.5	98.5	46	7′18	33	11	17	12	101	191	111	3.37	21.2	22.96	14.46	72.7	40
8		8	female	22	6	1.64	54.9	20.412	9′18	85	40	85	40	9′11	30	10	17	11	108	195	115	2.89	17.46	17.33	8.5	37.9	47
9		11	male	21	24	1.86	86.9	25.1185	7′30	95.5	45.5	96	45.5	7′33	24	9	17	9	108	181	115	3.13	17.12	17.04	8.81	75.5	54
10		12	male	19	1	1.7	56.7	19.6194		89	43	90	42	8′10	23	6	19	6	99	184	102	2.87	20.73	17.25	11.87	45.3	53
11		15	male	24	12	1.71	77.4	26.4697	7′20	91	42	90	42	7′34	25	9	17	9	93	177	90	2.89	19.41	16.84	9.14	86.2	48
12		27	female	19	24	1.57	50	20.2848		81	39	81.5	39.5	10′17	26	11	16	10	112	180	120	3.62	13.74	14.03	7.99	26.3	36
13		29	male	22	24	1.74	71.4	23.583		89.5	40.5	90	42	7′41	28	11	19	14	119	171	104	2.56	20.86	20.32	13.55	53.4	72
14		30	male	24	18	1.62	60.1	22.9005		81	37	81	37	7′59	29	11	19	11	107	186	90	2.91	11.09	12.12	7.1	40.2	32
1	sham-TENS group	10	male	22	24	1.8	76.5	23.6111		91	43	90.5	43.5	8′10	28	10	19	10	114	179	117	3.26	21.03	22.38	15.48	50.6
2		13	male	23	12	1.78	76.8	24.2394	7′30	94	44	95	44	7′39	27	9	19	9	109	184	101	2.76	19.96	20.34	11.23	65.3
3		14	female	21	24	1.7	52.7	18.2353		88	43	89	42	9′37	21	10	17	7	107	187	108	2.79	15.46	14.89	9.6	35.7
4		16	male	23	6	1.76	65.2	21.0486		93	46	94	45	7′39	28	10	20	11	112	183	107	3.14	21.34	19.19	14.39	56.6
5		17	male	24	12	1.86	77	22.2569	7′28	100	47	100	48	7′27	26	9	20	10	102	175	102	2.97	17.53	19.67	10.81	80.3
6		18	female	19	3	1.63	70.9	26.6852	8′30	80	37	81	37	8′41	28	10	17	7	94	182	104	2.96	19.55	18.42	12.24	29.9
7		19	male	21	3	1.77	81.7	26.0781	7′44	95	44.5	95.5	44.5	7′17	29	8	20	8	113	174	94	3.32	17.19	17.86	12.82	67.8
8		20	male	19	3	1.76	61.6	19.8864		91.5	43	91.5	43	8′44	21	11	19	11	95	177	108	1.09	15.06	16.08	7.52	58.9
9		21	male	24	12	1.73	73	24.3911		92	43	91.5	42	7′19	27	11	19	12	111	183	101	2.25	20.82	20.21	16.12	59.5
10		22	female	24	12	1.66	59.5	21.5924		87	39	86	40	8′59	25	8	16	6	82	172	78	2.67	12.11	9.96	6.83	48.1
11		23	male	22	12	1.85	76.6	22.3813	7′30	96.5	46.5	97	46	7′48	24	10	20	9	109	183	102	2.9	19.73	18.34	10.04	50.1
12		24	male	23	24	1.75	77.3	25.2408	7′30	91	41.5	92.5	41.5	7′14	27	8	16	11	97	181	118	2.88	17.79	19.72	8.68	56.9
13		25	male	19	12	1.85	79.7	23.2871		95	46	96	45.5	7′40	25	9	18	10	87	174	93	3.1	15.45	14.81	14.25	57.2
14		26	male	19	24	1.77	71.9	22.95		94	44.5	94	44.5	7′48	29	11	19	10	111	191	107	2.92	16.54	15.99	9.05	41.5
Surface EMG
muscle	group	Sex	side	mdf_0	mdf_1	mdf_2	rms_pct_0	rms_pct_1	rms_pct_2		group	TNES	1
VL	0	1	1	34.856	56.5594	45.5142	100	15.4756	12.7393			sham-TENS group	0
VL	0	1	0	47.5623	57.9804	56.1582	100	133.466	96.9691		Sex	Male	1
VL	0	1	1	55.4418	70.6234	53.4676	100	77.4497	114.773			Female	0
VL	0	1	0	66.7166	65.0218	66.6401	100	53.979	96.5214		side	left	1
VL	0	0	1	62.7202	66.8396	66.6806	100	170.967	161.919			right	0
VL	0	0	0	71.3999	83.3326	65.2812	100	85.912	104.445
VL	0	1	1	65.592	77.1889	62.2639	100	66.2291	103.768
VL	0	1	0	48.1821	49.6477	53.4864	100	113.822	105.272
VL	0	1	1	96.7222	80.5225	95.6405	100	91.4589	104.962
VL	0	1	0	93.4014	79.7252	95.042	100	106.692	122.805
VL	0	0	1	66.4898	56.1654	63.7822	100	185.893	115.002
VL	0	0	0	71.6086	71.0905	68.3712	100	114.195	96.8422
VL	0	1	1	70.0622	67.7759	65.3128	100	76.0449	66.8432
VL	0	1	0	56.6401	58.3499	69.7526	100	78.5491	144.576
VL	0	1	1	54.0797	63.4643	63.821	100	58.6466	78.0254
VL	0	1	0	55.5834	64.4647	65.0349	100	78.3491	134.084
VL	0	1	1	69.5863	53.8375	57.0373	100	188.277	162.784
VL	0	1	0	87.44	72.1198	71.2525	100	140.096	130.862
VL	0	0	1	61.7396	67.4398	65.5297	100	60.6299	99.6295
VL	0	0	0	61.2277	75.2926	54.8819	100	20.8349	50.8101
VL	0	1	1	71.2895	66.0908	77.2552	100	80.8493	57.327
VL	0	1	0	81.3032	62.2268	66.5666	100	110.579	116.795
VL	0	1	1	88.3667	75.0416	57.1565	100	93.7006	210.194
VL	0	1	0	85.0788	92.0477	94.0452	100	184.241	163.477
VL	0	1	1	65.5046	71.982	65.9797	100	91.0935	181.516
VL	0	1	0	61.4433	80.9967	72.7998	100	42.6897	82.9632
VL	0	1	0	76.7197	101.344	102.7	100
VL	0	1	1	91.4675	75.9094	89.9294	100	34.6241	24.2425
VL	1	0	1	64.1093	64.0277	53.8731	100	72.9357	74.5804
VL	1	0	0	62.349	55.1102	60.8711	100	83.6593	80.33
VL	1	1	1	63.5473	56.8352	57.4763	100	142.412	135.333
VL	1	1	0	57.2862	61.2803	67.6985	100	114.807	119.161
VL	1	1	1	133.668	84.3904	78.3888	100	81.2097	163.284
VL	1	1	0	70.0358	62.4906	90.9875	100	111.698	128.354
VL	1	1	1	96.7709	76.2377	78.0512	100	25.6673	117.539
VL	1	1	0	86.7038	80.1461	64.8768	100	103.873	83.6331
VL	1	1	1	64.8266	68.6156	69.2947	100	163.546	108.909
VL	1	1	0	71.6337	82.2354	89.8657	100	241.368	194.862
VL	1	1	1	72.9507	64.3169	75.6698	100	93.0751	93.3494
VL	1	1	0	68.7741	69.6261	69.3577	100	83.6543	83.3351
VL	1	1	1	84.2526	69.6612	69.2908	100	42.3929	123.441
VL	1	1	0	84.3924	49.7524	77.2046	100	81.49	106.436
VL	1	0	1	70.8203	69.2066	68.9604	100	119.923	151.121
VL	1	0	0	57.2747	70.3773	65.6135	100	134.069	112.387
VL	1	1	1	54.0427	65.6401	63.7328	100	65.7141	123.816
VL	1	1	0	72.2229	65.166	67.8158	100	97.8944	128.175
VL	1	1	1	111.715	124.231	116.88	100	144.261	193.186
VL	1	1	0	75.8957	113.44	94.1168	100	80.7506	93.986
VL	1	1	0	55.3785	46.5915	56.9056	100
VL	1	1	1	79.1786	73.8247	57.2154	100	116.215	133.258
VL	1	1	1	68.0055	72.524	71.9127	100	72.2439	122.376
VL	1	1	0	74.3122	70.265	75.9561	100	113.143	93.8516
VL	1	1	1	62.252	61.3021	55.5851	100	107.239	85.4506
VL	1	1	0	63.0251	63.5594	52.7163	100	127.847	109.56
VL	1	1	0	98.9662	96.0808	121.135	100	101.254	128.435
VL	1	1	1	78.199	98.2567	105.668	100	43.6507	52.7562
RF	0	1	1	72.8736	67.9915	66.6246	100	89.3886	75.3861
RF	0	1	0	52.4893	54.8745	57.2774	100	69.024	103.459
RF	0	1	1	87.2375	63.5855	81.7704	100	34.3956	104.206
RF	0	1	0	66.3968	63.0657	73.1915	100	70.1784	60.4994
RF	0	0	1	68.8661	66.3247	78.1728	100	141.164	121.884
RF	0	0	0	73.852	53.3146	59.6132	100	149.859	219.242
RF	0	1	1	55.3021	76.9064	90.5949	100	67.0828	80.0347
RF	0	1	0	48.7377	47.6702	64.0735	100	93.1925	117.297
RF	0	1	1	72.2099	72.8847	119.198	100	146.369	101.015
RF	0	1	0	86.1337	74.4296	79.6761	100	110.987	140.32
RF	0	0	1	82.9806	87.1669	79.5371	100	201.198	212.509
RF	0	0	0	71.7966	28.27	79.4967	100		185.451
RF	0	1	1	97.5842	85.2726	90.7676	100	94.5865	41.5428
RF	0	1	0	59.7204	67.4295	60.5776	100	106.817	123.036
RF	0	1	1	90.8003	84.9729	87.0568	100	74.6743	118.116
RF	0	1	0	58.4755	64.583	67.924	100	139.649	124.178
RF	0	1	1	81.8203	62.9091	88.2012	100	138.085	186.518
RF	0	1	0	55.4248	52.4749	56.8735	100	108.408	102.865
RF	0	0	1	97.8247	105.598	88.9884	100	88.75	77.9693
RF	0	0	0	55.5213	60.9138	53.568	100	124.211	199.078
RF	0	1	1	89.4505	71.3113	90.6824	100	46.3624	115.117
RF	0	1	0	85.3221	61.7774	98.0375	100	105.204	158.14
RF	0	1	1	141.083	97.015	117.774	100	44.1393	151.118
RF	0	1	0	122.939	91.0619	143.093	100	39.2928	100.229
RF	0	1	1	97.9833	67.1892	95.6897	100	41.0172	194.614
RF	0	1	0	79.9986	73.3158	82.8938	100	121.64	176.439
RF	0	1	0	111.278	100.277	85.1145	100	45.269	26.0801
RF	0	1	1	97.3102	98.4551	113.735	100	38.4487	51.0492
RF	1	0	1	79.7816	83.8349	81.9574	100	69.9749	112.292
RF	1	0	0	76.1307	78.1368	92.2591	100	66.7698	107.782
RF	1	1	1	81.4823	59.39	68.6789	100	147.621	91.7946
RF	1	1	0	85.0165	77.7207	77.9498	100	160.801	153.505
RF	1	1	1	113.709	78.4998	112.46	100	222.1	249.289
RF	1	1	0	116.442	84.0728	110.495	100	77.1212	86.4497
RF	1	1	1	123.71	98.313	135.715	100	124.477	125.258
RF	1	1	0	121.465	87.0335	124.754	100	96.0623	113.625
RF	1	1	1	69.1012	79.3566	95.8189	100	139.374	100.377
RF	1	1	0	75.8566	72.6051	80.3225	100	120.138	117.789
RF	1	1	1	83.0429	70.9233	78.059	100	121.946	84.6757
RF	1	1	0	73.0641	71.0615	79.5186	100	135.874	87.8566
RF	1	1	1	70.2288	66.6382	71.7902	100	56.4403	138.927
RF	1	1	0	97.5589	74.8562	106.885	100	66.2406	97.8003
RF	1	0	1	91.3129	91.9338	77.8099	100	125.216	144.198
RF	1	0	0	83.3707	90.9924	75.8224	100	211.431	151.373
RF	1	1	1	75.3372	75.3859	83.2148	100	114.686	146.63
RF	1	1	0	89.5629	92.7276	95.6159	100	147.472	103.39
RF	1	1	1	107.84	73.9989	77.9858	100	147.108	141.387
RF	1	1	0	85.508	75.6546	102.118	100	239.025	214.743
RF	1	1	0	73.7064	49.98	65.5315	100	368.634
RF	1	1	1	104.045	105.155	97.1054	100	103.487	77.1672
RF	1	1	1	60.4574	62.2203	65.6835	100	75.6106	100.204
RF	1	1	0	69.0657	64.9396	61.7749	100	100.65	113.765
RF	1	1	1	92.4951	76.7113	56.0731	100	92.951	55.1403
RF	1	1	0	58.611	55.3664	58.9846	100	161.211	210.857
RF	1	1	0	102.501	93.7374	111.496	100	148.469	149.883
RF	1	1	1	117.106	83.8665	122.9	100	77.5923	137.93
Torque （Nm)
Side	Group	T1	T2	T3	T1p	T2p	T3p		group	TNES	1
0	1	61.3088	55.323	75.8197	100	90.2367	123.669			sham-TENS group	0
0	1	112.716	99.0155	113.546	100	87.8453	100.737		Sex	Male	1
0	1	83.864	81.4803	114.853	100	97.1576	136.951			Female	0
0	1	64.3923	65.2993	65.4807	100	101.408	101.69		side	left	1
0	1	109.002	82.9972	110.302	100	76.1431	101.193			right	0
0	1	103.935	80.5358	117.72	100	77.4869	113.264
0	1	147.648	103.78	139.727	100	70.2889	94.6355
0	1	59.4878	46.7741	81.3053	100	78.628	136.675
0	1	153.334	129.979	139.118	100	84.7682	90.7285
0	1	82.1683	70.5595	79.9916	100	85.872	97.351
0	1	149.168	132.728	147.783	100	88.9791	99.0719
0	1	39.2423	38.0486	49.3885	100	96.9582	125.856
0	1	85.9252	81.9024	78.0406	100	95.3184	90.824
0	1	53.9882	46.4674	56.0026	100	86.0697	103.731
0	0	91.7818	79.8102	90.6934	100	86.9565	98.8142
0	0	124.019	97.2399	101.608	100	78.4074	81.9296
0	0	64.7551	63.8482	74.3686	100	98.5994	114.846
0	0	117.49	80.5409	105.45	100	68.5512	89.7527
0	0	174.012	119.837	138.04	100	68.8667	79.3275
0	0	40.1554	35.3206	39.081	100	87.9599	97.3244
0	0	131.71	93.6345	90.1378	100	71.0914	68.4366
0	0	106.837	88.154	88.8796	100	82.5127	83.1919
0	0	107.925	88.5168	104.297	100	82.0168	96.6387
0	0	71.7701	53.8648	72.5161	100	75.052	101.04
0	0	106.27	90.1496	113.058	100	84.8303	106.387
0	0	96.1341	74.8461	90.0518	100	77.8559	93.6731
0	0	118.736	100.469	91.1274	100	84.6154	76.7483
0	0	80.6189	76.7337	80.2304	100	95.1807	99.5181
1	1	71.8387	61.2578	75.7369	100	85.2713	105.426
1	1	99.7179	100.327	111.903	100	100.611	112.22
1	1	97.5163	89.9317	104.234	100	92.2222	106.889
1	1	55.6386	60.2457	74.4211	100	108.28	133.758
1	1	89.2816	75.846	102.067	100	84.9515	114.32
1	1	104.297	85.9774	106.293	100	82.4348	101.913
1	1	147.797	106.696	143.438	100	72.191	97.0506
1	1	62.784	46.7741	73.1434	100	74.5	116.5
1	1	130.588	110.279	136.884	100	84.4479	104.821
1	1	66.4506	57.9712	72.5073	100	87.2396	109.115
1	1	150.379	133.766	145.361	100	88.9528	96.6628
1	1	35.6631	35.51	45.3059	100	99.5708	127.039
1	1	91.3696	86.1781	82.7171	100	94.3182	90.5303
1	1	52.2423	42.0356	52.9138	100	80.4627	101.285
1	0	106.737	83.1621	89.6592	100	77.913	84
1	0	122.12	95.1507	85.2748	100	77.916	69.8289
1	0	63.1627	66.4506	69.5655	100	105.205	110.137
1	0	111.444	83.8314	106.279	100	75.2228	95.3654
1	0	177.202	117.984	146.463	100	66.5816	82.6531
1	0	28.74	38.1409	39.081	100	132.71	135.981
1	0	122.191	90.3321	69.1575	100	73.9269	56.5978
1	0	109.739	84.7077	86.8843	100	77.1901	79.1736
1	0	98.4645	78.0448	93.2731	100	79.2619	94.7276
1	0	78.7939	55.7208	81.6192	100	70.7171	103.586
1	0	99.6382	79.7106	91.9578	100	80	92.2917
1	0	96.472	71.8049	88.1933	100	74.4308	91.4186
1	0	108.045	98.7025	86.517	100	91.3534	80.0752
1	0	80.0362	74.2083	83.7271	100	92.7184	104.612
